# Supplementary material for: Duration of Invasive Mechanical Ventilation before Veno-Venous ExtraCorporeal Membrane Oxygenation for Covid-19 related Acute Respiratory Distress Syndrome: The experience of a tertiary care center
Source: Heliyon. 2024 May 29;10(11):e31811. doi: 10.1016/j.heliyon.2024.e31811 (PMC11176752; doi:10.1016/j.heliyon.2024.e31811)
Supplement: Multimedia component 1 [file mmc1.pdf]

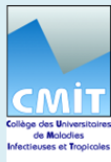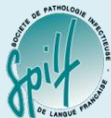

**Comité d'Ethique de  
Recherche en  
Maladies Infectieuses  
et Tropicales**

**Institutional Review Board  
N° IRB00011642**

**Maison de l'Infectiologie**  
21 rue Beaurepaire  
75010 PARIS

**Président**  
Pr Vincent LE MOING

**Secrétaire**  
Mme Nathalie GASTELLIER

**Membres :**  
Pr Louis BERNARD  
Pr Diane DESCAMPS  
Pr Vincent DUBEE  
Dr Aurélia EDEN  
Pr Marie KEMPF  
Dr Jean-Philippe LANOIX  
Pr Vincent LE MOING  
Pr Gilles PIALOUX  
Dr Valérie POURCHER  
Pr Pierre TATTEVIN

Paris, le 12/07/2023

|                                  |                                                                                                                                                                                                                                                                                 |
|----------------------------------|---------------------------------------------------------------------------------------------------------------------------------------------------------------------------------------------------------------------------------------------------------------------------------|
| <b>N° CER-MIT</b>                | 2022-0907-2                                                                                                                                                                                                                                                                     |
| <b>Titre de la recherche</b>     | Late venovenous Extracorporeal Membrane Oxygenation in patients with refractory acute respiratory distress syndrome due to SARS-CoV-2 / Impact sur la mortalité de la ventilation mécanique tardive chez les patients assistés tardivement en ECMO veino veineuse – Etude LEMOC |
| <b>Responsable scientifique</b>  | Dr. Mathilde Nativel                                                                                                                                                                                                                                                            |
| <b>Responsable de traitement</b> | CHU Nord de La Réunion                                                                                                                                                                                                                                                          |

Le 10/07/2023, le projet susmentionné a été revu par le CER-MIT après soumission d'une révision du projet initial qui avait obtenu l'avis réservé du Comité le 19 Septembre 2022. Les documents suivants ont été joints pour l'examen du dossier :

- Protocole : Version 2 du 30/04/2023
- Formulaire de soumission CER-MIT dument rempli
- Courrier d'information : Version 2 du 30/04/2023

**Après évaluation des documents de l'étude, le CER-MIT a émis l'avis  
suivant :**

**AVIS FAVORABLE**

En effet, au regard des documents évalués, le CER-MIT considère que du point de vue :

- **Réglementaire** : Le protocole n'implique pas la personne humaine comme défini dans le code de la santé publique (Code de la Santé Publique - Article R1121-1) et ne nécessite donc pas l'avis délibératif d'un Comité de Protection Personnes et/ou de l'autorité de santé compétente ;
- **Rationnel et intérêt scientifique et médical** : Le rationnel de l'étude est justifié, l'étude permettra d'apporter des données intéressantes à la communauté médicale.
- **Ethique** : Le comité n'a pas noté de problématique d'éthique sur le recueil des données.

**Le CER-MIT rappelle qu'il n'est pas compétent au regard de la loi Informatiques et Libertés et du Règlement Général sur la Protections des données. Il est à la charge du responsable de traitement de s'y mettre en conformité.**

Le comité rappelle qu'il incombe au responsable scientifique de s'assurer que tous les collaborateurs associés à ce projet sont informés des conditions d'approbation et des documents approuvés.

Le comité rappelle que le responsable de l'étude est tenu de fournir au CER-MIT **un rapport final de l'étude ou la publication approuvée.**

Bien cordialement,

Pr Vincent LE MOING  
Président du CER-MIT
